# Supplementary material
Source: PubMed Central journal article supplement (PMC5436045)
Supplement: NIHMS856973-supplement-Supplemental_Data.pdf [file NIHMS856973-supplement-Supplemental_Data.pdf]

## Supporting Information

# Lysine Acetylation Facilitates Spontaneous DNA Dynamics in the Nucleosome

Jongseong Kim, Jaehyoun Lee, and Tae-Hee Lee\*

Department of Chemistry  
The Pennsylvania State University  
University Park, PA 16802

\*Correspondence to [txl18@psu.edu](mailto:txl18@psu.edu)

**Figure S1. Mass-spectrometric analysis of the acetylated H3K56.** Mass-spectrometric analysis confirms acetylation at H3K<sub>s</sub>56 (Mw=15297 detected, 15298 expected; ±1 error in Mw is common in mass spec analysis of macromolecular complexes).

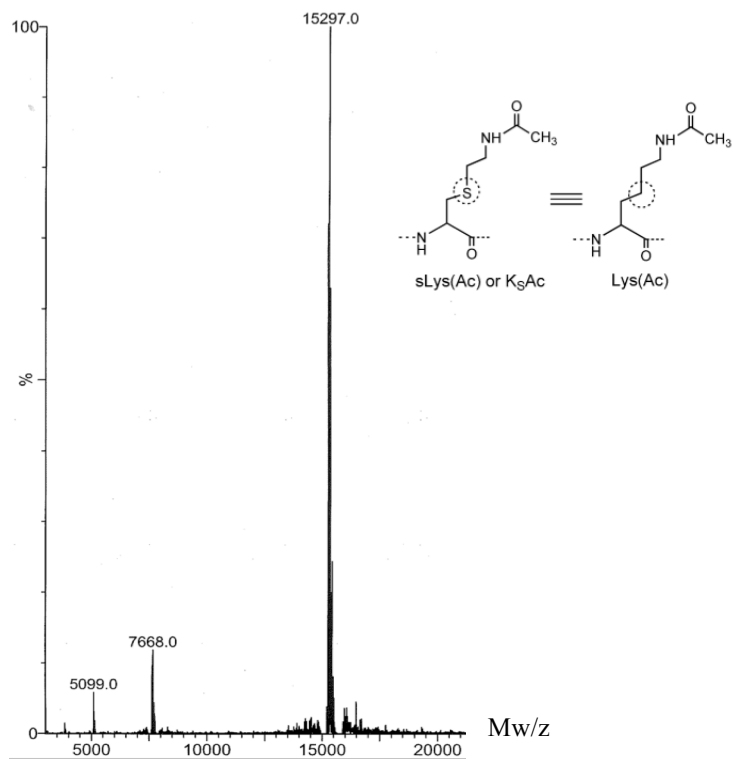

**Figure S2. Nucleosomal DNA construct used for the measurements.** A 147 bp human  $\alpha$ -satellite sequence<sup>1</sup> was prepared by ligating 6 oligonucleotide fragments. A single strand 20 base linker DNA with a biotin (gray filled circle) at its 5' end was added to the 5' end of the nucleosomal DNA. Cy3 (green filled circle) was labeled along the phosphate backbone of the Watson (forward) strand replacing the 76<sup>th</sup> nucleotide and ATTO647N was labeled terminally at the 5' of the Crick (reverse) strand. The DNA sequence and the labeling position are listed below.

Watson (Forward) strand:

5'-/Biotin/CAACGAAATC CTCCGAGAGG TCCAAATATC CACCTGCAGA  
 TTCTACCAA AGTGTATTTG GAAACTGCTC CATCAAAGG CATGTTTCAGC  
 TCTG*i*Cy3/AGTG AACTCCATC ATCACAAAGA ATATTCTGAG  
 AATGCTTCCG TTTGCCTTTT ATATGAACTT CCTTCCT

Crick (Reverse) strand:

5'-/ATTO647N/AGGAAGGAAG TTCATATAAA AGGCAAACGG AAGCATTCTC  
 AGAATATTCT TTGTGATGAT GGAGTTTCAC TCA*C*AGAGCT GAACATGCCT  
 TTTGATGGAG CAGTTTCAA ATACACTTTT GGTAGAATCT GCAGGTGGAT  
 ATTTGGA

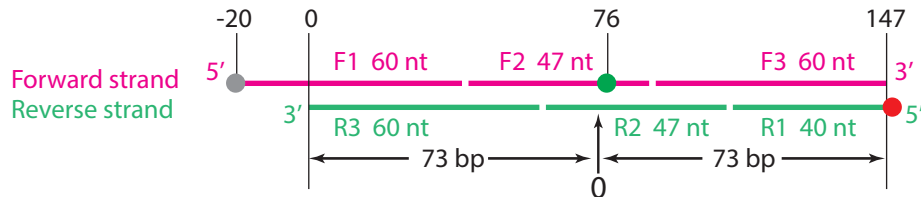

**Figure S3. Reconstituted nucleosomes analyzed with native PAGE.** A native gel (5% PAGE at 0.2x TBE) image of the acetylated nucleosome sample (H3K56ac) shows annealing shift and homogenization of nucleosome positioning. The image was analyzed in Cy3, Cy5, and FRET (Cy3 excitation and Cy5 emission filter) channels, respectively, with a Typhoon Imager (9400 series, GE Healthcare).

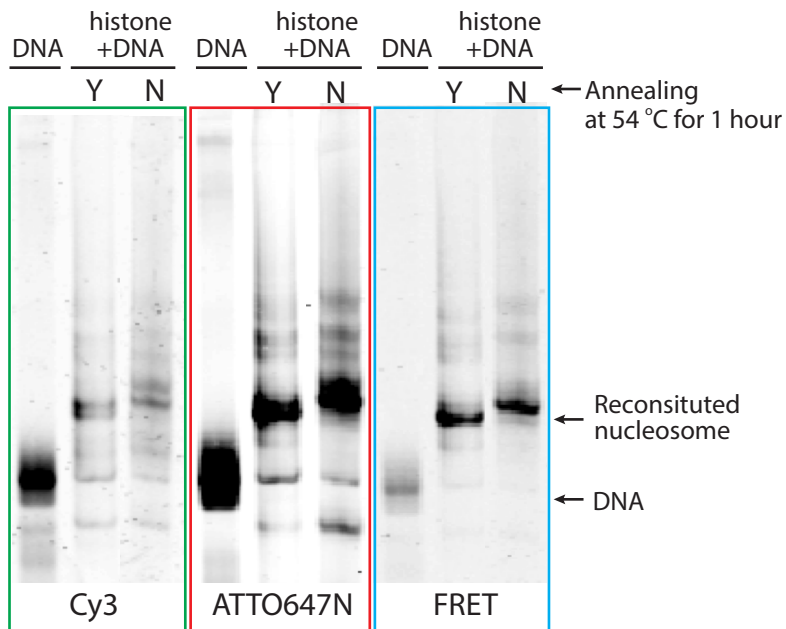

**Table S1. FRET efficiencies of the open and the closed states shown in figure 2B.** Nucleosomes are made with the H3K56 acetylated and unacetylated histone core.

| NaCl   | Nucleosome   | $\epsilon_{open}$ | $\epsilon_{close}$ | $\epsilon_{avg}$  |
|--------|--------------|-------------------|--------------------|-------------------|
| 50 mM  | Acetylated   | 0.619 $\pm$ 0.082 | 0.786 $\pm$ 0.055  | 0.717 $\pm$ 0.040 |
|        | Unacetylated | 0.612 $\pm$ 0.088 | 0.757 $\pm$ 0.054  | 0.698 $\pm$ 0.036 |
| 100 mM | Acetylated   | 0.595 $\pm$ 0.088 | 0.787 $\pm$ 0.043  | 0.733 $\pm$ 0.042 |
|        | Unacetylated | 0.612 $\pm$ 0.090 | 0.773 $\pm$ 0.035  | 0.719 $\pm$ 0.043 |

**Table S2. FCS spectra fitting results.** FCS spectra of ATTO647N from the nucleosomal DNA were fit to a double exponential decay function within the range of 0.1 ms ~ 7 ms. The decay times ( $\tau$ ) and the amplitudes of the faster dynamic components are shown.

| NaCl   | Nucleosome   | $\tau$ (ms <sup>-1</sup> ) | Amplitude         |
|--------|--------------|----------------------------|-------------------|
| 50 mM  | Acetylated   | 0.17 $\pm$ 0.01            | 0.025 $\pm$ 0.001 |
|        | Unacetylated | 0.24 $\pm$ 0.02            | 0.025 $\pm$ 0.001 |
| 100 mM | Acetylated   | 0.14 $\pm$ 0.01            | 0.046 $\pm$ 0.002 |
|        | Unacetylated | 0.16 $\pm$ 0.02            | 0.033 $\pm$ 0.003 |

## References

1. Harp, J. M.; Uberbacher, E. C.; Roberson, A. E.; Palmer, E. L.; Gewiess, A.; Bunick, G. J., X-ray diffraction analysis of crystals containing twofold symmetric nucleosome core particles. *Acta crystallographica. Section D, Biological crystallography* **1996**, 52 (Pt 2), 283-8.
